# Supplementary material
Source: PubMed Central journal article supplement (PMC5933881)
Supplement: NIHMS952905-supplement-1.pdf [file NIHMS952905-supplement-1.pdf]

**Supplemental Table 1. Diagnosis Codes for Anxiety**

| Code   | Vocabulary |
|--------|------------|
| F40.01 | ICD10CM    |
| F40.1  | ICD10CM    |
| F40.10 | ICD10CM    |
| F40.11 | ICD10CM    |
| F41.0  | ICD10CM    |
| F41.1  | ICD10CM    |
| F42    | ICD10CM    |
| F43.1  | ICD10CM    |
| F43.10 | ICD10CM    |
| F43.11 | ICD10CM    |
| F43.12 | ICD10CM    |
| 300    | ICD9CM     |
| 300    | ICD9CM     |
| 300.01 | ICD9CM     |
| 300.02 | ICD9CM     |
| 300.09 | ICD9CM     |
| 300.21 | ICD9CM     |
| 300.23 | ICD9CM     |
| 300.29 | ICD9CM     |
| 300.3  | ICD9CM     |
| 309.81 | ICD9CM     |

**Supplemental Table 2. Diagnosis Codes for Depression**

| Code   | Vocabulary |
|--------|------------|
| F31.3  | ICD10CM    |
| F31.30 | ICD10CM    |
| F31.31 | ICD10CM    |
| F31.32 | ICD10CM    |
| F31.4  | ICD10CM    |
| F31.5  | ICD10CM    |
| F32    | ICD10CM    |
| F32.0  | ICD10CM    |
| F32.1  | ICD10CM    |
| F32.2  | ICD10CM    |
| F32.3  | ICD10CM    |
| F32.4  | ICD10CM    |
| F32.5  | ICD10CM    |
| F32.8  | ICD10CM    |
| F32.9  | ICD10CM    |
| F33    | ICD10CM    |
| F33.0  | ICD10CM    |
| F33.1  | ICD10CM    |
| F33.2  | ICD10CM    |
| F33.3  | ICD10CM    |
| F33.4  | ICD10CM    |
| F33.40 | ICD10CM    |
| F33.41 | ICD10CM    |
| F33.42 | ICD10CM    |
| F33.8  | ICD10CM    |
| F33.9  | ICD10CM    |
| F34.1  | ICD10CM    |
| F43.2  | ICD10CM    |
| F43.20 | ICD10CM    |
| F43.21 | ICD10CM    |
| F43.22 | ICD10CM    |
| F43.23 | ICD10CM    |
| F43.24 | ICD10CM    |
| F43.25 | ICD10CM    |
| F43.29 | ICD10CM    |
| 296.2  | ICD9CM     |

Leveraging electronic medical records to study pain following mastectomy

|        |        |
|--------|--------|
| 296.2  | ICD9CM |
| 296.21 | ICD9CM |
| 296.22 | ICD9CM |
| 296.23 | ICD9CM |
| 296.24 | ICD9CM |
| 296.25 | ICD9CM |
| 296.26 | ICD9CM |
| 296.3  | ICD9CM |
| 296.3  | ICD9CM |
| 296.31 | ICD9CM |
| 296.32 | ICD9CM |
| 296.33 | ICD9CM |
| 296.34 | ICD9CM |
| 296.35 | ICD9CM |
| 296.36 | ICD9CM |
| 296.5  | ICD9CM |
| 296.5  | ICD9CM |
| 296.51 | ICD9CM |
| 296.52 | ICD9CM |
| 296.53 | ICD9CM |
| 296.54 | ICD9CM |
| 296.55 | ICD9CM |
| 296.56 | ICD9CM |
| 300.4  | ICD9CM |
| 309    | ICD9CM |
| 309    | ICD9CM |
| 309.1  | ICD9CM |
| 309.2  | ICD9CM |
| 309.21 | ICD9CM |
| 309.22 | ICD9CM |
| 309.23 | ICD9CM |
| 309.24 | ICD9CM |
| 309.28 | ICD9CM |
| 309.29 | ICD9CM |
| 309.3  | ICD9CM |
| 309.4  | ICD9CM |
| 309.8  | ICD9CM |
| 309.81 | ICD9CM |
| 309.82 | ICD9CM |

Leveraging electronic medical records to study pain following mastectomy

|        |        |
|--------|--------|
| 309.83 | ICD9CM |
| 309.89 | ICD9CM |
| 309.9  | ICD9CM |
| 311    | ICD9CM |

**Supplemental Table 3. Identification Strategy for Analgesia**

| Institution | Vocabulary                    | Attribute        | Value      |
|-------------|-------------------------------|------------------|------------|
| AH          | RxNorm                        | thera_class_name | ANALGESICS |
| VHA         | National<br>Drug<br>Formulary |                  | ANALGESICS |

**Supplemental Table 4. Procedural Codes and Categorization of Breast Cancer Excision Surgeries**

| <b>Category</b> | <b>CPT Code</b> | <b>Description</b>                                                                                                                                                                                                                          |
|-----------------|-----------------|---------------------------------------------------------------------------------------------------------------------------------------------------------------------------------------------------------------------------------------------|
| Mild            | 19126           | Excision of breast lesion identified by preoperative placement of radiological marker, open; each additional lesion separately identified by a preoperative radiological marker (List separately in addition to code for primary procedure) |
|                 | 19125           | Excision of breast lesion identified by preoperative placement of radiological marker, open; single lesion                                                                                                                                  |
|                 | 38525           | Biopsy or excision of lymph node(s); open, deep axillary node(s)                                                                                                                                                                            |
|                 | 38500           | Biopsy or excision of lymph node(s); open, superficial                                                                                                                                                                                      |
|                 | 38745           | Axillary lymphadenectomy; complete                                                                                                                                                                                                          |
|                 | 38740           | Axillary lymphadenectomy; superficial                                                                                                                                                                                                       |
| Moderate        | 19307           | Mastectomy, modified radical, including axillary lymph nodes, with or without pectoralis minor muscle, but excluding pectoralis major muscle                                                                                                |
|                 | 19303           | Mastectomy, simple, complete                                                                                                                                                                                                                |
| Severe          | 19306           | Mastectomy, radical, including pectoral muscles, axillary and internal mammary lymph nodes (Urban type operation)                                                                                                                           |
|                 | 19305           | Mastectomy, radical, including pectoral muscles, axillary lymph nodes                                                                                                                                                                       |

**Supplemental Table 5. Procedural Codes and Categorization of Breast Cancer**

**Reconstruction Surgeries**

| <b>Category</b> | <b>CPT Code</b> | <b>Description</b>                                                                                                                                                               |
|-----------------|-----------------|----------------------------------------------------------------------------------------------------------------------------------------------------------------------------------|
| Autologous      | 19361           | Breast reconstruction with latissimus dorsi flap, without prosthetic implant                                                                                                     |
|                 | 19364           | Breast reconstruction with free flap                                                                                                                                             |
|                 | 19367           | Breast reconstruction with transverse rectus abdominis myocutaneous flap (TRAM), single pedicle, including closure of donor site                                                 |
|                 | 19368           | Breast reconstruction with transverse rectus abdominis myocutaneous flap (TRAM), single pedicle, including closure of donor site; with microvascular anastomosis (supercharging) |
|                 | 19369           | Breast reconstruction with transverse rectus abdominis myocutaneous flap (TRAM), double pedicle, including closure of donor site                                                 |
| Implant         | 19324           | Mammoplasty, augmentation; without prosthetic implant                                                                                                                            |
|                 | 19325           | Mammoplasty, augmentation; with prosthetic implant                                                                                                                               |
|                 | 19340           | Immediate insertion of breast prosthesis following mastopexy, mastectomy or in reconstruction                                                                                    |
|                 | 19342           | Delayed insertion of breast prosthesis following mastopexy, mastectomy or in reconstruction                                                                                      |
|                 | 19357           | Breast reconstruction, immediate or delayed, with tissue expander, including subsequent expansion                                                                                |
|                 | 19370           | Open periprosthetic capsulotomy, breast                                                                                                                                          |
|                 | 19371           | Periprosthetic capsulectomy, breast                                                                                                                                              |
| Oncoplastic     | 19316           | mastopexy                                                                                                                                                                        |
|                 | 19318           | reduction mammoplasty                                                                                                                                                            |
|                 | 19350           | Nipple/areola reconstruction                                                                                                                                                     |
|                 | 19371           | Revision of reconstructed breast                                                                                                                                                 |

**Supplemental Table 6. Procedural Codes for Chemotherapy**

| CPT Code |
|----------|
| 96401    |
| 96402    |
| 96405    |
| 96406    |
| 96409    |
| 96411    |
| 96413    |
| 96415    |
| 96416    |
| 96417    |
| 96420    |
| 96422    |
| 96423    |
| 96425    |
| 96440    |
| 96446    |
| 96450    |



**Supplemental Table 7. Procedural Codes for Radiation Therapy**

| CPT Code |
|----------|
| 0394T    |
| 0395T    |
| 1010875  |
| 1010895  |
| 1010896  |
| 1010898  |
| 1010904  |
| 1010905  |
| 1010910  |
| 1010911  |
| 1010914  |
| 1010917  |
| 1010919  |
| 1010921  |
| 1014921  |
| 1015092  |
| 1015093  |
| 1022242  |
| 1022243  |
| 1027847  |
| 1027848  |
| 77014    |
| 77299    |
| 77371    |
| 77372    |
| 77373    |
| 77385    |
| 77386    |
| 77387    |
| 77399    |
| 77401    |
| 77402    |
| 77407    |
| 77412    |
| 77417    |
| 77422    |

Leveraging electronic medical records to study pain following mastectomy

|       |
|-------|
| 77423 |
| 77424 |
| 77425 |
| 77427 |
| 77431 |
| 77432 |
| 77435 |
| 77469 |
| 77470 |
| 77499 |
| 77520 |
| 77521 |
| 77522 |
| 77523 |
| 77524 |
| 77525 |
| 77600 |
| 77601 |
| 77602 |
| 77603 |
| 77604 |
| 77605 |
| 77606 |
| 77607 |
| 77608 |
| 77609 |
| 77610 |
| 77611 |
| 77612 |
| 77613 |
| 77614 |
| 77615 |
| 77616 |
| 77617 |
| 77618 |
| 77619 |
| 77620 |
| 77750 |
| 77761 |

Leveraging electronic medical records to study pain following mastectomy

|       |
|-------|
| 77762 |
| 77763 |
| 77767 |
| 77768 |
| 77770 |
| 77771 |
| 77772 |
| 77778 |
| 77789 |
| 77790 |
| 77799 |
| G6001 |
| G6002 |
| G6003 |
| G6004 |
| G6005 |
| G6006 |
| G6007 |
| G6008 |
| G6009 |
| G6010 |
| G6011 |
| G6012 |
| G6013 |
| G6014 |
| G6015 |
| G6016 |
| G6017 |

**Supplemental Table 8. Identification Strategy for Hormone Therapy**

| Institution | Vocabulary                    | Attribute   | Value                                             |
|-------------|-------------------------------|-------------|---------------------------------------------------|
| AH          | RxNorm                        | pharm_class | SELECTIVE ESTROGEN RECEPTOR<br>MODULATORS (SERMS) |
|             |                               |             | ANTINEOPLASTIC - AROMATASE INHIBITORS             |
| VHA         | National<br>Drug<br>Formulary |             | ANTINEOPLASTIC HORMONES                           |
|             |                               |             | ANTINEOPLASTIC,OTHER                              |

**Supplemental Table 9. Select Outcomes stratified by days to follow-up in the AH and VHA**

|                     | <b>Discharge day</b> | <b>30 day</b>      | <b>90 day</b>      | <b>365 days</b>     |
|---------------------|----------------------|--------------------|--------------------|---------------------|
| <b>AH (N=735)</b>   |                      |                    |                    |                     |
| Pain                | avg (SD) 2.2 ± 1.7   | avg (SD) 1.0 ± 1.6 | avg (SD) 0.7 ± 1.4 | avg (SD) 0.93 ± 1.4 |
|                     | 25% 0.67             | 25% 0.00           | 25% 0.00           | 25% 0.00            |
|                     | 50% 2.17             | 50% 0.00           | 50% 0.00           | 50% 0.00            |
|                     | 75% 3.41             | 75% 2.00           | 75% 0.85           | 75% 1.50            |
|                     | max 8.00             | max 10.0           | max 8.67           | max 8.20            |
| Analgesic, n(%)     | --                   | 252 (34.3)         | 142 (19.3)         | 264 (35.9)          |
| PM, n(%)            | --                   | 2 (0.3)            | 4 (0.5)            | 11 (1.5)            |
| PT, n(%)            | --                   | 29 (4.9)           | 58 (7.9)           | 88 (12.0)           |
| <b>VHA (N=1210)</b> |                      |                    |                    |                     |
| Pain                | avg (SD) 3 ± 2       | avg (SD) 2 ± 2     | avg (SD) 2 ± 2     | avg (SD) 2 ± 2      |
|                     | 25% 0.68             | 25% 0.00           | 25% 0.00           | 25% 0.00            |
|                     | 50% 2.44             | 50% 1.00           | 50% 0.50           | 50% 1.75            |
|                     | 75% 3.86             | 75% 3.00           | 75% 3.00           | 75% 3.63            |
|                     | max 9.00             | max 10.00          | max 10.00          | max 10.0            |
| Analgesic, n(%)     | --                   | 368 (30.4)         | 301 (24.9)         | 652 (53.9)          |
| PM, n(%)            | --                   | 11 (0.9)           | 13 (1.0)           | 66 (5.5)            |
| PT, n(%)            | --                   | 125 (10.3)         | 122 (10.1)         | 283 (23.4)          |
